# Supplementary material for: Mapping of Rice Varieties and Sowing Date Using X-Band SAR Data
Source: MDPI journal article supplement (doi:10.3390/s18010316), 2018-01-22
Supplement: s1 [file s1]

## Sheet: General parameters
Plot	Sowing date	Harvesting date	Variety			Plant height	Plot	20130819	20130830	20130904	20130913	20130926	20131006	20131017	20131028	20131110
1	20130816	20131110	50404			(cm)	1		15.21	29.6667	45.6	48.3	54.2	71.8	64.6
2	20130808	20131106	50404				2		18	32.9667	43	54.24	58.8	68.4	65
3	20130811	20131107	50404				3		21.66	45	44.56	48.72	62.2	75.6	69.4
4	20130819	20131113	50404				4		10.73	27.6667	32.4	50.6	55.4	78.8	75.6	64.4
5	20130815	20131112	OM4218				5		25.46	26.78	32.48	53	54	81.2	74.66	66.36
6	20130814	20131109	50404				6		26.16	32.84	38.14	49.7	56.8	78.7	75.74
7	20130802	20131106	OM4218				7		20.98	39.12	46.08	65	78.7	92.6	78.04
8	20130825	20131207	OM4218				8		4.14	15.9	20	43.6	65	64.1	61.4	88.1
9	20130810	20131108	Jasmine				9	8.4	17.56	34.3	37	55.2	73.2	79	77.6
10	20130818	20131128	Jasmine				10		13.2	25.9	27.2	52.4	57	70.2	98.88	98.4
11	20130828	20131130	OM4218				11		0.66	8.5	17.4	42.6	52	62.9	63.8	76.5
12	20130803	20131110	OM4218				12		2.16		34.8	53	73.2	80.14	69.6
13	20130904	20131217	OM4218				13				5.5	21.4	34	51.7	61.1	71.3
14	20130825	20131117	50404				14		5.04	12.8	25.4	44.2	62	72.4	85.4	80.4
15	20130821	20131116					15		10.8	12.8	27	45.2	65.8	84.6	82	74
16	20130817	20131118	OM4218				16		15.6	18.3	31.4	48.2	63.6	72	78.6	71.9
17	20130819	20131126	Jasmine				17		13.98	18.9	38.6	62.4	70	78.6	104.4	93
18	20130818	20131128	Jasmine				18		12.52	19.32	30.4	45.2	62	66.2	81.2	77.6
19	20130820	20131113	50404				19		11.2	15.96	26.5	43.8	49.3	77.2	75.58	79.9
20	20130819	20131128	Jasmine				20		12.54	19.68	32.58	50	55.4	78.4	79.98	92.1
21	20130820	20131128	Jasmine				21		10.46	15.64	26.78	40.8	59	70.2	75.12	88.8
22	20130907	20131217	50404				22				10.1	28.2	19.7	32.8	51.8	70.2
23	20130814	20131110	50404				23		18.8	28.1667	42.24	57.92	61.6	76.8	63	58.6
24	20130819	20131113	50404				24		12.6	24	36.22	60.5	62.2	79.6	72.2	68.8
25	20130822	20131120	OM4218				25		9.2	14.3333	31.46	46.1	48.8	65.8	88.8	82.8
26	20130821	20131116	50404				26		6.82	16.52	29.68	44.1	53.62	74.2	75.42	77.98
27	20130824	20131118	50404				27		6.94	18.78	28.24	45.2	55.3	74.8	77.44	76.4
28	20130810	20131114	OM4218				28	15.8	27.88	33.4	34.6	52.8	71.2	83.4	75.3	87
29	20130806	20131111	OM4218				29	16.6	25.62	45.5	34.8	56.4	76.6	79.2	68.4	75.7
30	20130814	20131120	OM4218				30	1.6	14.84	22.4	21	44.6	48.8	60.86	65	71.3
31	20130816	20131121	OM4218				31	1.2	15.8	22.4	24.8	41	56.2	59.3	69.2	74.5
32	20130810	20131116	OM4218				32	7.28	19.58	19.8	28.1	57.2	65.8	86.2	87.6	81.4
33	20130812	20131113	OM4218				33	11.5	21.04	29.5	24.1	59	78.2	86	88.2	84
34	20130808	20131119					34	7.74	16.9	23.88	32.5	60.2	70.4	74.6	93.6	90.4
35	20130808	20131110	OM4218				35	9.9	22.7	24.74	28	54.6	64	84.2	90.8	85.2
36	20130809	20131112	OM4218				36	13.36	34.6	28.28	38.2	66	78	99.8	97.4	82.8
37	20130815	20131124	OM4218				37	4.18	14.9	19.38	40.9	54	69.8	85.8	96.2	95.8
38	20130803	20131102	50404				38		26.34	30.5	52.54	54.6	68.1	75.2	72.76
39	20130818	20131108	50404				39		16.98	25.96	35.98	49.6	52	75.6	73.88
40	20130815	20131108	50404				40		19.78	28.46	38.4	47.7	62.2	77.4	72.92

## Sheet: Confusion matrix
						the confusion matrices for rice type mapping as well as rice variety detection:
			Rice/Non-rice detection									Rice variety detection
